## PRESYNAPTIC CALCIUM CURRENTS AND FACILITATION OF SEROTONIN RELEASE AT SYNAPSES BETWEEN CULTURED LEECH NEURONES

BY R. R. STEWART, W. B. ADAMS AND J. G. NICHOLLS

*Department of Pharmacology, Biocenter, Klingelbergstrasse 70, CH-4056 Basel,  
Switzerland*

*Accepted 21 March 1989*

### Summary

1. The role of presynaptic  $\text{Ca}^{2+}$  entry in facilitation of transmitter release has been analysed by voltage-clamp measurements at synapses formed in culture by Retzius and P neurones isolated from the central nervous system (CNS) of the leech. The transmitter released by Retzius cells is serotonin.

2. Synaptic transmission persisted in solutions containing raised concentrations of divalent cations, reduced concentrations of  $\text{Na}^+$ , and tetraethylammonium ( $\text{TEA}^+$ ) and 4-AP (to block  $\text{K}^+$  currents).  $\text{Ca}^{2+}$  and  $\text{Sr}^{2+}$  were more effective in promoting transmitter release than  $\text{Ba}^{2+}$ , as assessed by the postsynaptic potentials in P cells. The degree and time course of facilitation in  $\text{Ca}^{2+}$ - and  $\text{Sr}^{2+}$ -containing solutions were similar to those observed for synapses bathed in normal L-15 medium.

3. Transmitter release depended upon the amplitude and the duration of presynaptic depolarization and inward  $\text{Ca}^{2+}$  current. Peak  $\text{Ca}^{2+}$  currents and postsynaptic potentials occurred with depolarizing steps to +15 mV. Frequent or prolonged pulses depressed the postsynaptic potentials.

4. Pairs of depolarizing pulses that caused facilitation were accompanied by identical inward  $\text{Ca}^{2+}$  currents. These results indicate that the mechanism responsible for facilitated serotonin release must occur following  $\text{Ca}^{2+}$  entry and that residual  $\text{Ca}^{2+}$  plays a role.

### Introduction

At neuromuscular junctions of frogs and crustaceans, several lines of evidence point to 'residual calcium' as an underlying mechanism for facilitation (Dudel & Kuffler, 1961*a,b*; Katz & Miledi, 1965, 1968; Dodge & Rahamimoff, 1967; Rahamimoff & Yaari, 1973; Parnas *et al.* 1986). If each impulse in a pair of impulses were to allow the same amount of  $\text{Ca}^{2+}$  to enter but removal was slow, the second  $\text{Ca}^{2+}$  transient would cause greater release, since the initial baseline level would be higher. Alternatively, the second depolarization could give rise to a larger inward  $\text{Ca}^{2+}$  flux that would produce a larger response.

Key words: leech neurones, facilitation, calcium currents, serotonin.

There are few preparations in which a direct correlation can be made between  $\text{Ca}^{2+}$  entry and transmitter release, apart from the giant synapse of the squid (Llinas *et al.* 1981a,b; Charlton *et al.* 1982; Smith *et al.* 1985; Augustine & Charlton, 1986). At the squid synapse, the transmitter is not known and facilitation in normal  $\text{Ca}^{2+}$  is small (Charlton *et al.* 1982; Stanley, 1986). The primary aim of the present experiments has been to determine by voltage-clamp analysis whether presynaptic facilitation of  $\text{Ca}^{2+}$  entry occurs at chemical synapses formed between Retzius and P sensory cells isolated from the CNS of the leech and maintained in tissue culture. The advantages of this synapse are (1) that serotonin has been identified as the transmitter and (2) that the degree of facilitation in normal  $\text{Ca}^{2+}$  is large, up to 400%, and persists for 250 ms or more (Henderson, 1983; Henderson *et al.* 1983; Dietzel *et al.* 1986).

With voltage-clamp it is possible to record inward  $\text{Ca}^{2+}$ ,  $\text{Sr}^{2+}$  and  $\text{Ba}^{2+}$  currents in Retzius cells after  $\text{K}^+$  currents have been blocked by  $\text{TEA}^+$  and 4-AP and  $\text{Na}^+$  currents are reduced (Stewart *et al.* 1989). Since tetrodotoxin does not block  $\text{Na}^+$  currents in leech neurones, they are reduced by lowering external  $\text{Na}^+$  concentration (Nicholls & Kuffler, 1964; Kleinhaus & Prichard, 1983; Beleslin, 1985). An important feature of this preparation is that the cells are virtually isopotential (Ross *et al.* 1987, 1988). Synaptic potentials in the P cell are chloride-dependent and are still present under the conditions used for measuring  $\text{Ca}^{2+}$  currents (Fuchs *et al.* 1982). Moreover, with pairs of impulses the facilitated synaptic potentials recorded in the P cell can be attributed to increased numbers of quanta (Henderson *et al.* 1983).

Using these synapses in culture the following measurements have been made. (1) The time course and amplitude of facilitation in solutions containing low  $\text{Na}^+$  and  $\text{TEA}^+$  in comparison to those recorded in normal L-15 medium. (2) The relationship between presynaptic divalent cation currents and serotonin release. (3) Successive divalent cation currents evoked by two presynaptic depolarizations following in rapid succession. In addition, we have compared the effectiveness of  $\text{Ca}^{2+}$ ,  $\text{Sr}^{2+}$  and  $\text{Ba}^{2+}$  for releasing transmitter. A brief report of some of these observations has been published elsewhere (Stewart *et al.* 1987).

## Materials and methods

### *Cell culture and synapse formation*

The methods for removing and culturing leech neurones have already been described (Fuchs *et al.* 1981; Dietzel *et al.* 1986; Stewart *et al.* 1989). In brief, individual Retzius and P sensory cells were removed from the CNS of the leech by looping or by suction after mild enzyme treatment. Pairs of cells were plated in microwell dishes coated with polylysine or concanavalin A, and maintained at 20°C in Leibowitz 15 (L-15) culture medium supplemented with 2% foetal calf serum (FCS), 0.6% glucose, and 2 mmol l<sup>-1</sup> glutamine. Under these conditions recordings with voltage-sensitive dyes indicate that depolarizing and hyperpolarizing pulses spread to the ends of the processes without detectable attenuation (Ross

*et al.* 1987, 1988). Synapses formed within a few days and were tested between days 2 and 12 in culture.

#### *Voltage-clamp and data analysis*

Two-electrode voltage-clamp was used to measure  $\text{Ca}^{2+}$  currents in Retzius cells that had formed synapses with P cells. Electrodes were filled with  $4 \text{ mol l}^{-1}$  potassium acetate and had resistances of 15–30  $\text{M}\Omega$ . Electrode resistances within this range allowed rapid delivery of large currents and produced small capacitive coupling. Electrode resistances lower than 15  $\text{M}\Omega$  damaged cells and caused large leak currents.

Divalent cation currents were recorded after blocking  $\text{K}^+$  currents with  $\text{TEA}^+$ , or with  $\text{TEA}^+$  and 4-AP, and reducing  $\text{Na}^+$  currents with a low external  $\text{Na}^+$  concentration (see solutions in Table 1). For measuring  $\text{Ca}^{2+}$  currents during short, 5–10 ms stimulation pulses, the addition of 4-AP was necessary since in  $100 \text{ mmol l}^{-1}$   $\text{TEA}^+$  a residual, fast-activating and fast-inactivating outward  $\text{K}^+$  current of 5–10 nA remained ( $I_A$ ; see Stewart *et al.* 1989). 4-AP reduced this residual current so that it was barely measurable. In experiments in which stimuli of longer duration (20 ms or greater) were used, measurements of the divalent cation current were taken at the end of the current trace. By this time  $I_A$  had inactivated and the  $\text{Ca}^{2+}$  current–voltage relationships in solutions containing  $\text{TEA}^+$  were essentially the same with or without 4-AP. Even in the presence of  $\text{TEA}^+$ , 4-AP and  $\text{Cd}^{2+}$ , to block divalent cation currents, a slowly increasing outward current remained that increased in amplitude with progressively larger depolarizations of +20 to +50 mV. This caused our measurement of the  $\text{Ca}^{2+}$ ,  $\text{Ba}^{2+}$  or  $\text{Sr}^{2+}$  reversal potential to be lower than expected.  $\text{Ca}^{2+}$  reversal potentials measured in single, internally perfused Retzius cells in which  $\text{K}^+$  currents were more completely blocked were higher by 15 mV or more (R. J. Bookman & Liu, unpublished results).

For analyses of synaptic function, single or twin depolarizing pulses of fixed duration (5–120 ms) were delivered to the Retzius cell from a holding potential of –50 mV. We waited for 45 s between tests of synaptic function to avoid depression. In some experiments, three hyperpolarizing pulses, each one-third of the amplitude of the depolarizing pulse (P/3), were delivered before each trial. In others, identical depolarizing and hyperpolarizing pulses were used. The currents generated during the hyperpolarizing pulses were used later for leak subtraction. The postsynaptic P cells, which were not voltage-clamped, were impaled with a single KCl electrode of 20–40  $\text{M}\Omega$  to reverse IPSPs and maintain the membrane potential at a constant value during the experiment. Control experiments have shown that such reversal potentials remain constant in amplitude over periods of hours while the KCl electrode remains in the P cell (Fuchs *et al.* 1981; Henderson *et al.* 1983). Transmission tended to fail after a few trials in the low- $\text{Na}^+$ , high divalent cation,  $\text{TEA}^+$  and 4-AP solutions. Several variables were tested but failed to improve stability. These included: (1) adding glucose to the recording medium, (2) reducing the  $\text{Na}^+$  concentration from 125 to 30  $\text{mmol l}^{-1}$  instead of 10  $\text{mmol l}^{-1}$

to keep the  $\text{Na}^+/\text{Ca}^{2+}$  exchanger functioning and (3) adding 5-hydroxytryptophan ( $0.2 \text{ mmol l}^{-1}$ ), the immediate precursor of serotonin (5-HT). No information is available about effects of  $\text{Ba}^{2+}$  and  $\text{Sr}^{2+}$  on postsynaptic 5-HT receptors. Changes in  $\text{Ca}^{2+}$  concentration do not affect the amplitudes of miniature potentials in P cells (Henderson *et al.* 1983).

'Almost Perfect Electronic' voltage amplifiers, voltage-clamps and stimulators were used. Records were stored on a Hewlett-Packard tape recorder and analysed for leak subtraction and averaging on a Minc-Declab computer as described by Stewart *et al.* (1989). Records were filtered with a Bessel filter having a bandwidth of 2.5 kHz. Capacitative and leak currents were subtracted from current records produced by depolarizing voltage pulses. Holding currents were then subtracted to give a zero baseline.

### Solutions

Cells were cultured in supplemented L-15 as described above. Shortly before beginning an experiment, the L-15 medium bathing the cells was replaced with one of the solutions shown in Table 1. Most of the experiments were done in solution 4.

### Results

#### *Effectiveness of divalent cations for transmitter release in solutions containing low $\text{Na}^+$ and high TEA<sup>+</sup> levels*

Cultured Retzius cells gave prolonged action potentials in low external  $\text{Na}^+$  concentrations, with  $\text{K}^+$  channels largely blocked. In the presence of  $10 \text{ mmol l}^{-1}$   $\text{Ca}^{2+}$ ,  $\text{Sr}^{2+}$  or  $\text{Ba}^{2+}$  the duration of action potentials could be extended from the normal value of about 5 ms to as long as 45 s (Fig. 1; solution 1, Table 1).  $\text{Ba}^{2+}$  produced action potentials of the longest duration followed by  $\text{Sr}^{2+}$  then  $\text{Ca}^{2+}$ .  $\text{Ca}^{2+}$ ,  $\text{Sr}^{2+}$  or  $\text{Ba}^{2+}$  action potentials in the Retzius cell all triggered transmitter release and evoked synaptic potentials of large amplitude and long duration in the

Table 1. *Solutions*

| Solution no. | NaCl ( $\text{mmol l}^{-1}$ ) | KCl ( $\text{mmol l}^{-1}$ ) | Divalent cation ( $\text{mmol l}^{-1}$ ) | TEA-Cl ( $\text{mmol l}^{-1}$ ) | 4-AP ( $\text{mmol l}^{-1}$ ) |
|--------------|-------------------------------|------------------------------|------------------------------------------|---------------------------------|-------------------------------|
| 1            | 10                            | 4                            | 10                                       | 30                              | —                             |
| 2            | 10                            | 4                            | 10                                       | 100                             | —                             |
| 3            | 30                            | 4                            | 10                                       | 100                             | —                             |
| 4            | 30                            | 4                            | 10                                       | 100                             | 5                             |

All solutions were buffered to pH 7.4 with  $10 \text{ mmol l}^{-1}$  Tris maleate. Osmolarity was adjusted to between  $350$  and  $370 \text{ mosmol l}^{-1}$  with *N*-methyl-D-glucamine chloride (NMG-Cl).

TEA-Cl, tetraethylammonium chloride; 4-AP, 4-aminopyridine; Divalent cation,  $\text{Ca}^{2+}$ ,  $\text{Ba}^{2+}$  or  $\text{Sr}^{2+}$ .

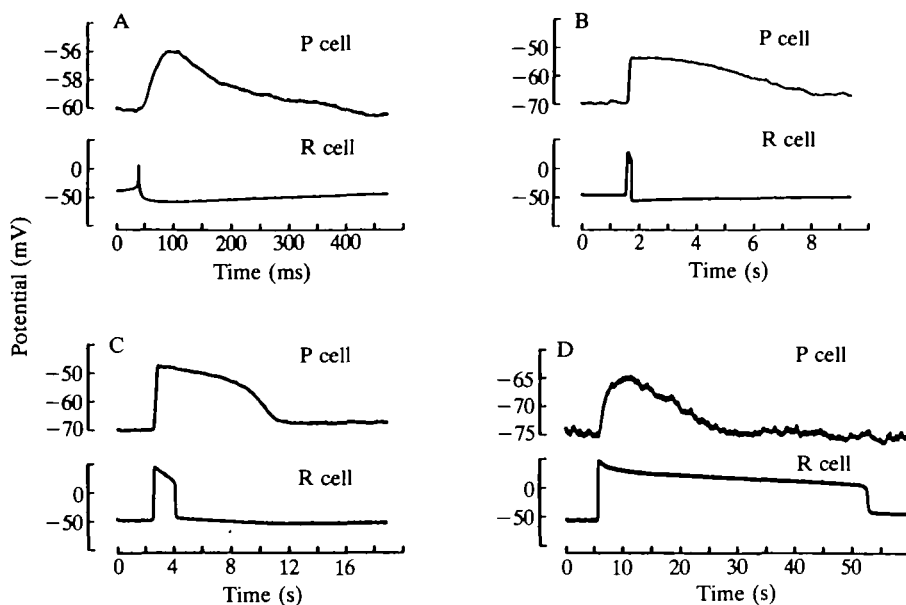

Fig. 1. Relationship between action potentials in Retzius cells and synaptic potentials in P cells. (A) In normal L-15 solution the presynaptic action potential evoked a depolarizing synaptic potential in the P cell. (B) After blocking  $K^+$  channels with  $30\text{ mmol l}^{-1}$   $\text{TEA}^+$  and reducing  $\text{Na}^+$  to  $10\text{ mmol l}^{-1}$ , the prolonged  $\text{Ca}^{2+}$  action potential evoked a large prolonged synaptic potential. (C) In  $10\text{ mmol l}^{-1}$   $\text{Sr}^{2+}$  or in  $10\text{ mmol l}^{-1}$   $\text{Ba}^{2+}$  (D) the presynaptic action potentials continued to release transmitter and evoke large synaptic potentials. KCl electrodes in P cells for all recordings. Solution 1 of Table 1 was used in B, C and D.

postsynaptic P cell. Whereas  $\text{Ca}^{2+}$  and  $\text{Sr}^{2+}$  solutions were able to sustain synaptic release for many trials, release failed within a few trials in solutions containing  $\text{Ba}^{2+}$ . When recordings were made in these solutions with KCl electrodes, synaptic potentials in P cells appeared as depolarizing events.

Fig. 2 shows examples of transmitter release under voltage-clamp in normal L-15 and with  $\text{Ca}^{2+}$ ,  $\text{Sr}^{2+}$  and  $\text{Ba}^{2+}$  as charge carriers. In normal L-15 and in  $\text{Ca}^{2+}$  and  $\text{Sr}^{2+}$  solutions, release occurred with voltage-clamp pulses as short as 5 ms (Fig. 2A–C). In solutions containing  $\text{Ba}^{2+}$ , release only occurred occasionally with pulses of very long duration (120 ms or greater; see Fig. 2D) and with total integrated currents of  $1336 \pm 345$  pC (s.e.m.,  $N = 6$  trials). In  $\text{Ca}^{2+}$  the integrated current was  $522 \pm 60$  pC ( $N = 25$  trials), and for  $\text{Sr}^{2+}$  it was  $319 \pm 54$  pC ( $N = 16$  trials). These results indicated that the potency for promoting release was considerably greater for  $\text{Sr}^{2+}$  and  $\text{Ca}^{2+}$  than for  $\text{Ba}^{2+}$ .

In the presence of  $\text{TEA}^+$ , 4-AP and reduced  $\text{Na}^+$ , transmission between Retzius and P cells failed more rapidly than in normal L-15 solution. As a result, only a limited number of trials could be made in any one experiment. In some pairs of cells,  $\text{Ca}^{2+}$  currents in the Retzius cell diminished with repeated trials, but in

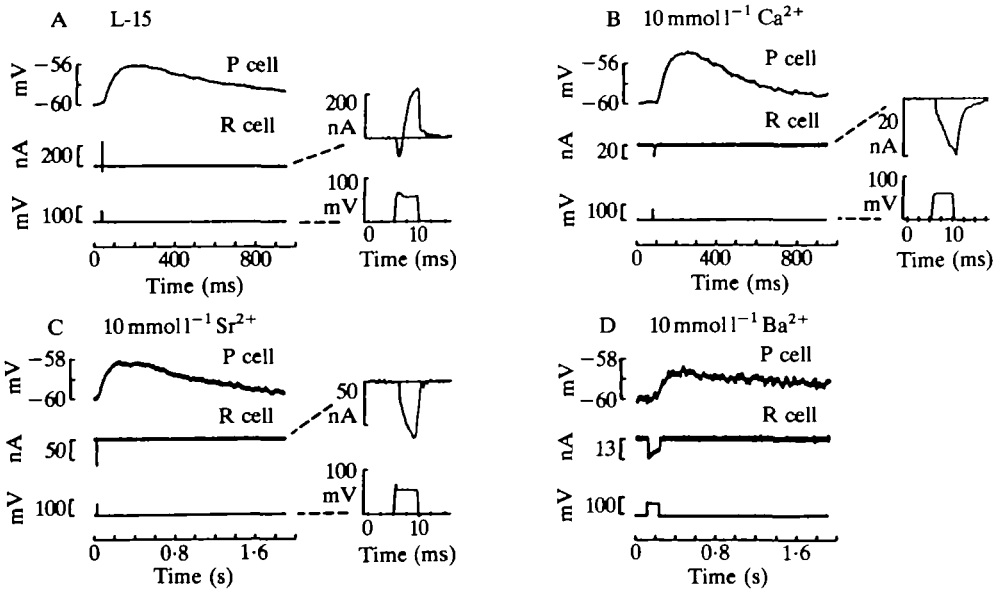

Fig. 2. Relationship between  $\text{Ca}^{2+}$ ,  $\text{Sr}^{2+}$  and  $\text{Ba}^{2+}$  currents in Retzius cells and synaptic potentials in P cells. (A) In normal L-15 solution presynaptic depolarization of the Retzius cell elicited a depolarizing synaptic potential in the P cell (top trace). Inset: inward  $\text{Na}^+$  and outward  $\text{K}^+$  currents evoked by step depolarization of a Retzius cell to  $+6$  mV are shown on a faster time scale (see also Dietzel *et al.* 1986). (B)  $\text{Ca}^{2+}$  currents measured in a Retzius cell and release of transmitter after blockage of  $\text{K}^+$  currents and reduction of  $\text{Na}^+$  to  $10 \text{ mmol l}^{-1}$ . As in A, the upper trace shows the synaptic potential in the P cell. Current and voltage of the Retzius cell are below. Inset: inward  $\text{Ca}^{2+}$  current evoked by step depolarization of the Retzius cell to  $+7$  mV is shown on a faster time scale. (C) In  $10 \text{ mmol l}^{-1} \text{Sr}^{2+}$ , release was comparable to that in  $\text{Ca}^{2+}$  (upper trace, P cell synaptic potential; lower traces Retzius cell current and voltage). Inset: inward  $\text{Sr}^{2+}$  current evoked by step depolarization to  $+4$  mV. By contrast to release in  $\text{Ca}^{2+}$  and  $\text{Sr}^{2+}$ , transmission in  $10 \text{ mmol l}^{-1} \text{Ba}^{2+}$  (D) occurred infrequently and required presynaptic depolarizations of long duration. The voltage step in D was to  $+4$  mV. Holding potentials were  $-50$  mV in A, B and C and  $-55$  mV in D. KCl electrodes in P cells for all recordings. Solution 2 of Table 1 was used in B, C and D.

others,  $\text{Ca}^{2+}$  currents persisted unchanged for minutes after transmitter release had been depressed.

#### *Relationship between inward $\text{Ca}^{2+}$ currents and transmitter release*

In Fig. 3A the inward  $\text{Ca}^{2+}$  current measured in the presynaptic Retzius cell reached its maximum amplitude at a depolarization of  $+15$  mV and reversed at  $+35$  mV. In six experiments, the amplitude of the  $\text{Ca}^{2+}$  current reached a maximum at  $+13 \pm 2.5$  mV (S.E.M.) and with larger depolarizations decreased to zero at  $+33 \pm 2.0$  mV. This decrease was presumably the result in part of a reduced driving force for  $\text{Ca}^{2+}$ . Part of the decline, however, could be attributed to outward  $\text{K}^+$  currents not completely blocked by  $\text{TEA}^+$  and 4-AP; such residual

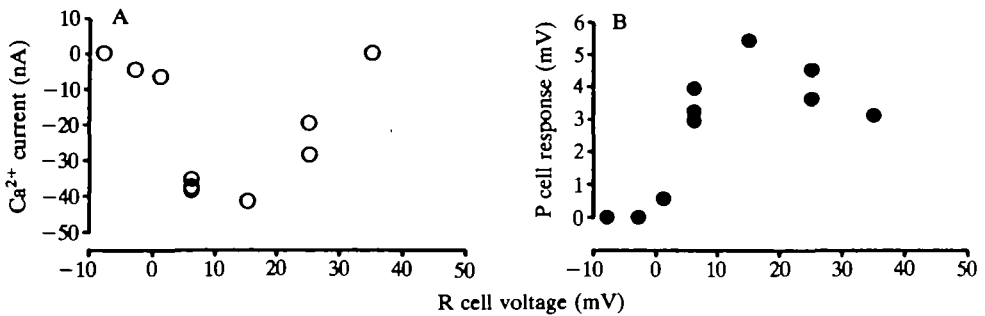

Fig. 3. Relationship between  $\text{Ca}^{2+}$  current and transmitter release at a Retzius-P cell synapse in culture for 6 days. (A) Current-voltage relationship for  $\text{Ca}^{2+}$ .  $\text{Ca}^{2+}$  currents were measured at the end of 20 ms pulses; the holding potential was  $-60$  mV. (B) Synaptic transfer function for the Retzius-P cell synapse (same pair of cells as in A). P cell responses are expressed as changes from a resting potential of  $-60$  mV and are plotted against Retzius cell voltage steps. Recorded in solution 3 of Table 1.

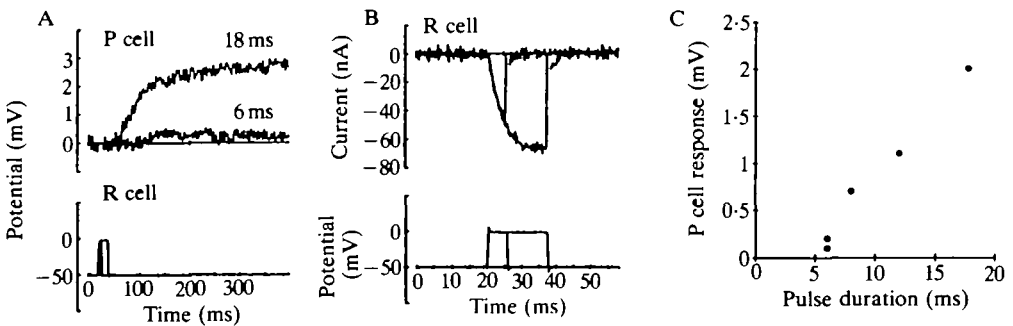

Fig. 4. Presynaptic pulse duration,  $\text{Sr}^{2+}$  currents and P cell responses. (A) Two examples of P cell responses to voltage-clamp pulses of 6 ms and 18 ms in duration. Note the sustained P cell response to the 18 ms pulse. (B)  $\text{Sr}^{2+}$  currents in the Retzius cell evoked by voltage steps of 6 and 18 ms. (C) Change in P cell response is plotted against pulse duration. Solution 4 of Table 1 with  $10 \text{ mmol l}^{-1}$   $\text{SrCl}_2$ .

$\text{K}^+$  currents became more pronounced as the driving force increased (see Materials and methods). Correlated with the larger inward  $\text{Ca}^{2+}$  current following depolarizations up to  $+15$  mV was a steep increase of transmitter release (Fig. 3B). At larger depolarizations, transmitter release in the absence of net inward current is probably the result of masking of  $\text{Ca}^{2+}$  currents by residual outward  $\text{K}^+$  currents. After normalization, the relationship between integrated  $\text{Ca}^{2+}$  current and transmitter release was similar to that for  $\text{Ca}^{2+}$  current amplitude measured at the end of 20 ms pulses. The experiment shown in Fig. 3 was unusual in the large number of points we were able to obtain in the solutions before depression became apparent.

The synaptic potentials in P cells also depended critically on the duration of the pulse delivered to the Retzius cell, as shown in Fig. 4 in which  $\text{Sr}^{2+}$  was the charge

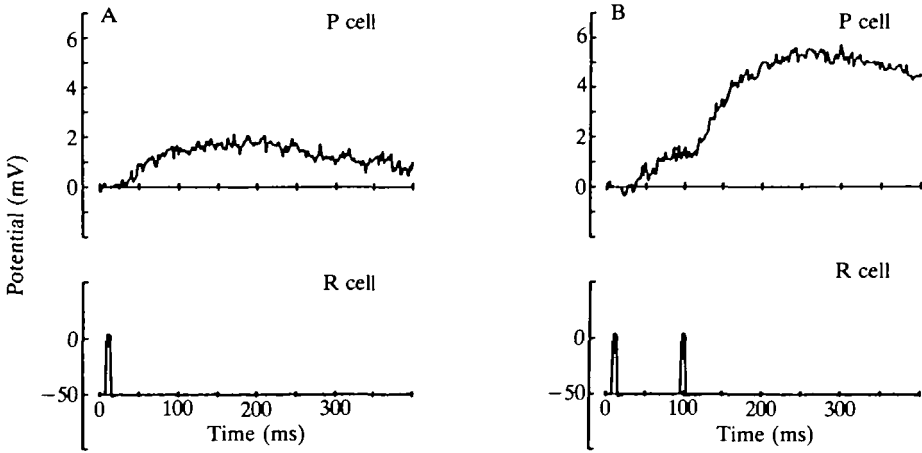

Fig. 5. Facilitation of postsynaptic potentials in a P cell in response to step depolarizations of the Retzius cell (pulse duration 5 ms). (A) P cell response to a single voltage-clamp step. The P cell potential was maintained at  $-60$  mV. (B) Facilitated P cell response to two voltage-clamp pulses of the Retzius cell. Twin steps were separated by 88 ms. Facilitation was 200%. Voltage step to  $+5$  mV from holding potential of  $-50$  mV. Solution 4 of Table 1 with  $10 \text{ mmol l}^{-1} \text{ CaCl}_2$ .

carrier. Pulses shorter than 5 ms were ineffective. Similar results were obtained with  $\text{Ca}^{2+}$  in the bathing fluid. After a pulse longer than 20 ms, a second depolarization of the Retzius cell evoked only a small synaptic potential. Such depression could persist for several minutes and precluded detailed examination of the effects of long depolarizing pulses on the Retzius cell.

#### *Facilitation of transmitter release*

In solutions containing  $\text{TEA}^+$ , 4-AP and reduced  $\text{Na}^+$ , facilitation was still apparent (solution 4 of Table 1). With two brief voltage-clamped pulses to the presynaptic Retzius cell, the second gave rise to a facilitated synaptic potential in the P cell. An example is shown in Fig. 5. The amount of facilitation reached values as high as 460% and persisted for over 250 ms. Fig. 6 shows the time course of facilitation under voltage-clamp conditions with currents other than  $\text{Ca}^{2+}$  largely blocked. The same graph shows points obtained in normal L-15 with paired action potentials and with paired voltage-clamp pulses. Although the recordings were made in solutions of markedly different composition, facilitation was remarkably similar.

When sequential  $\text{Ca}^{2+}$  currents were measured with twin voltage-clamp pulses, their amplitudes and time courses were indistinguishable (Fig. 7). Fig. 7A shows two superimposed traces of presynaptic voltage pulses (below) in the Retzius cell and synaptic potentials (above) in the P cell. The second pulse, delivered after an interval of 45 ms, produced a synaptic potential facilitated by  $410 \pm 25\%$  (S.E.M.,  $N = 4$  trials). Such facilitation has been shown to be due to increased numbers of



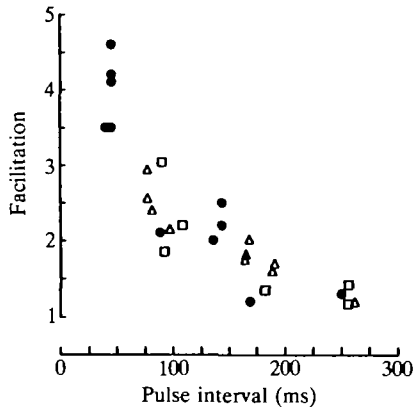

Fig. 6. Facilitation of P cell responses plotted against the interval (time) between stimuli. The filled circles represent responses obtained while recording  $\text{Ca}^{2+}$  currents from four Retzius-P cell pairs during voltage-clamp pulses in  $\text{TEA}^+$ , low- $\text{Na}^+$  solution (Solution 4 of Table 1). The open squares are responses during voltage-clamp pulses in L-15 (from Dietzel *et al.* 1986). The open triangles represent P cell responses to pairs of action potentials in the Retzius cell at different intervals (from Dietzel *et al.* 1986). 'Facilitation' is the ratio of second response peak to first.

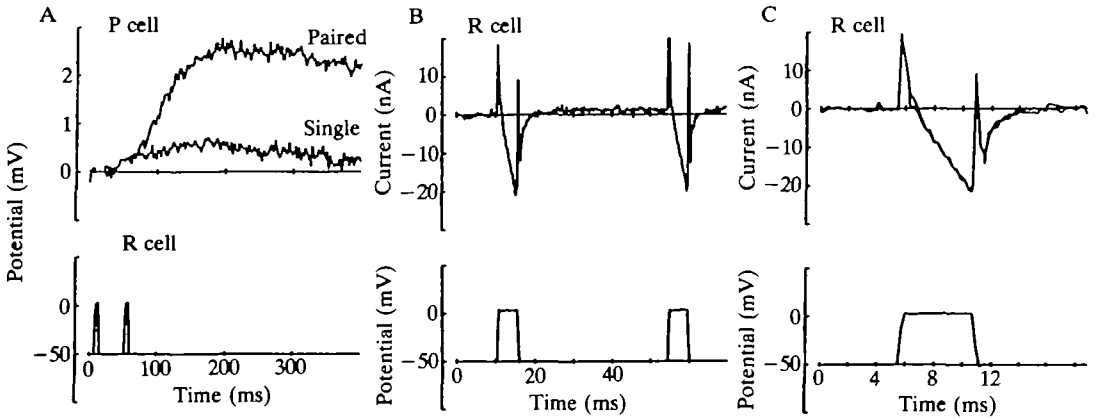

Fig. 7. Facilitation of P cell responses is not due to facilitated  $\text{Ca}^{2+}$  entry. (A) Synaptic potentials in a P cell in response to single and paired voltage-clamp stimuli to a Retzius cell. Paired pulses were separated by 45 ms. (B)  $\text{Ca}^{2+}$  currents during each of the two stimuli. (C) The first  $\text{Ca}^{2+}$  current trace is superimposed onto the second current trace. These traces are virtually identical. Solution 4 of Table 1.

serotonin quanta released from the presynaptic Retzius cell (Henderson *et al.* 1983). The two inward  $\text{Ca}^{2+}$  currents are shown in Fig. 7B and are superimposed in Fig. 7C. Identical  $\text{Ca}^{2+}$  currents during twin pulses delivered to the Retzius cell were observed in six pairs of cells. In 42 pairs of cells, the second  $\text{Ca}^{2+}$  current was smaller by  $2.8 \pm 1.1\%$  ( $N = 48$  trials). For the four pairs of cells of Fig. 6 in which

clear facilitation was observed, the mean amplitude of the second  $\text{Ca}^{2+}$  current was reduced slightly by  $0.05 \pm 1.4\%$  ( $N = 11$  trials). Thus, the same quantity of  $\text{Ca}^{2+}$  or slightly less, but not more, entered the Retzius cell during facilitated transmitter release.

### Discussion

In the present series of experiments, the abilities of  $\text{Ca}^{2+}$ ,  $\text{Sr}^{2+}$  and  $\text{Ba}^{2+}$  to produce release of transmitter were determined under current- and voltage-clamp. Moreover, direct measurements of inward  $\text{Ca}^{2+}$  currents were made during twin stimulation pulses in which strong facilitation of transmitter release occurred. Our results indicate that  $\text{Ca}^{2+}$  and  $\text{Sr}^{2+}$  were more effective than  $\text{Ba}^{2+}$  at releasing transmitter. These results are similar to those found by Callaway & Stuart (1987) in that  $\text{Ca}^{2+}$  and  $\text{Sr}^{2+}$ , but not  $\text{Ba}^{2+}$ , were able to sustain transmitter release at a synapse made by barnacle photoreceptors. By contrast, Augustine & Eckert (1984) determined at the squid giant synapse that  $\text{Ba}^{2+}$  and  $\text{Sr}^{2+}$  were less able to produce significant transmitter release.

Several lines of evidence suggest that residual calcium plays a role in two-pulse facilitation of transmitter release (Katz & Miledi, 1968; Charlton *et al.* 1982; Ross *et al.* 1987). Thus, the time course and amplitude of facilitation, as well as the effects of alterations in external  $\text{Ca}^{2+}$  and  $\text{Mg}^{2+}$  concentration can be explained in terms of  $\text{Ca}^{2+}$  entry and the steep sigmoidal relationship between  $\text{Ca}^{2+}$  concentration and transmitter release. In addition, measurements of intracellular  $\text{Ca}^{2+}$  with voltage-sensitive dyes indicate that successive  $\text{Ca}^{2+}$  transients with paired presynaptic impulses are similar and that  $\text{Ca}^{2+}$  concentration remains raised (Charlton *et al.* 1982; Ross *et al.* 1987). In the present experiments, direct measurements of inward  $\text{Ca}^{2+}$  currents showed that the second voltage-clamp pulse did not give rise to a larger inward current than the first. The two currents were identical in their time courses and amplitudes. These results support the idea that it takes a significant time for intracellular  $\text{Ca}^{2+}$  levels to fall after the first pulse; and that while the level remains elevated, the second identical increase in  $\text{Ca}^{2+}$  can release more transmitter.

There remain problems in the interpretation of our results, however. As with voltage-clamp studies made at other synapses, we cannot rule out the presence of a distinct population of  $\text{Ca}^{2+}$  channels with different characteristics localized to presynaptic release sites. Current recordings made from an entire cell would not be expected to reveal the properties of such channels or the currents they contribute. Experiments with patch-clamp and loose patch-clamp should enable such regional differences in  $\text{Ca}^{2+}$  channels to be analysed (Bookman & Dagan, 1987; Bookman *et al.* 1987). Another problem is that serotonin, to which Retzius cells are sensitive, may have presynaptic effects on the facilitation process following  $\text{Ca}^{2+}$  entry. Presynaptic application of serotonin should allow us to determine if changes in release occur that resemble facilitation. A technical problem was that  $\text{K}^+$  currents could not be blocked completely by  $\text{TEA}^+$  and

4-AP in Retzius cells and so the inward currents were contaminated with outward currents, especially with large depolarizations. The sharp decline in inward currents without abolition of release can probably be attributed to this effect (Fig. 3). A second technical difficulty was to maintain transmission constant for long enough to make reproducible observations in the abnormal solutions required for  $\text{Ca}^{2+}$  current measurements. Nevertheless, findings such as those shown in Fig. 7 provide convincing evidence for similar inward calcium transients during facilitation. The alternative explanation of similar net inwardly directed current traces, attributable to complex but precise summation of both increased inward and outward currents following the second pulse, seems unlikely.

Certain quantitative problems indicate that residual  $\text{Ca}^{2+}$  on its own may not account for various aspects of facilitation observed at neuromuscular synapses. It has been suggested, for example, that presynaptic voltage changes might activate molecules with which  $\text{Ca}^{2+}$  interacts to produce transmitter release (Parnas *et al.* 1986; Parnas & Parnas, 1986). The size of the leech neurones and the proximity of the cell bodies to transmitter release sites should permit a direct test of the independent effects of presynaptic depolarization and raised intracellular  $\text{Ca}^{2+}$  levels.

We thank Dr R. J. Bookman for his help and encouragement throughout these experiments and Mrs H. Niederer and P. Lüdin for their skilful preparation of cell cultures. We are grateful to Ms J. Wittker for her excellent secretarial assistance and to Mr P. Baettig for photographing the figures. This work was supported by grants from the Swiss National Fund and the US Navy to JGN; RRS was supported by an NIH Postdoctoral Fellowship.

### References

- AUGUSTINE, G. J. & CHARLTON, M. P. (1986). Calcium dependence of presynaptic calcium current and post-synaptic response at the squid giant synapse. *J. Physiol., Lond.* **381**, 619–640.
- AUGUSTINE, G. J. & ECKERT, R. (1984). Divalent cations differentially support transmitter release at the squid giant synapse. *J. Physiol., Lond.* **346**, 257–271.
- BELESLIN, B. B. (1985). Sensitivity of the resting sodium conductivity of leech Retzius nerve cells to tetrodotoxin. *Comp. Biochem. Physiol.* **81C**, 323–328.
- BOOKMAN, R. J. & DAGAN, D. (1987). Single potassium channel activity recorded from leech neurones in culture. *J. Physiol., Lond.* **390**, 76P.
- BOOKMAN, R. J., REUTER, H., NICHOLLS, J. G. & ADAMS, W. B. (1987). Loose-patch mapping of ion channel distributions in cultured leech neurones. *Soc. Neurosci. Abstr.* **13**, 1442.
- CALLAWAY, J. C. & STUART, A. E. (1987). The effect of strontium, barium and strychnine on the synapse made by barnacle photoreceptors. *Biol. Bull. mar. biol. Lab., Woods Hole* **173**, 441.
- CHARLTON, M. P., SMITH, S. J. & ZUCKER, R. S. (1982). Role of presynaptic calcium ions and channels in synaptic facilitation and depression at the squid giant synapse. *J. Physiol., Lond.* **323**, 173–193.
- DIETZEL, I. D., DRAPEAU, P. & NICHOLLS, J. G. (1986). Voltage dependence of 5-hydroxytryptamine release at a synapse between identified leech neurones in culture. *J. Physiol., Lond.* **372**, 191–205.
- DODGE, F. A., JR & RAHAMIMOFF, R. (1967). Co-operative action of calcium ions in transmitter release at the neuromuscular junction. *J. Physiol., Lond.* **193**, 419–432.

- DUDEL, J. & KUFFLER, S. W. (1961a). The quantal nature of transmission and spontaneous miniature potentials at the crayfish neuromuscular junction. *J. Physiol., Lond.* **155**, 514–529.
- DUDEL, J. & KUFFLER, S. W. (1961b). Mechanism of facilitation at the crayfish neuromuscular junction. *J. Physiol., Lond.* **155**, 530–542.
- FUCHS, P. A., HENDERSON, L. P. & NICHOLLS, J. G. (1982). Chemical transmission between individual Retzius and sensory neurones of the leech in culture. *J. Physiol., Lond.* **323**, 195–210.
- FUCHS, P. A., NICHOLLS, J. G. & READY, D. F. (1981). Membrane properties and selective connexions of identified leech neurones in culture. *J. Physiol., Lond.* **316**, 203–223.
- HENDERSON, L. (1983). The role of 5-hydroxytryptamine as a transmitter between identified leech neurones in culture. *J. Physiol., Lond.* **339**, 309–324.
- HENDERSON, L., KUFFLER, D. P., NICHOLLS, J. G. & ZHANG, R.-J. (1983). Structural and functional analysis of synaptic transmission between identified leech neurones in culture. *J. Physiol., Lond.* **340**, 347–358.
- KATZ, B. & MILEDI, R. (1965). The effect of calcium on acetylcholine release from motor nerve terminals. *Proc. R. Soc. B* **161**, 496–503.
- KATZ, B. & MILEDI, R. (1968). The role of calcium in neuromuscular transmission. *J. Physiol., Lond.* **195**, 481–492.
- KLEINHAUS, A. L. & PRICHARD, J. W. (1983). Differential action of tetrodotoxin on identified leech neurons. *Comp. Biochem. Physiol.* **74C**, 211–218.
- LLINAS, R., STEINBERG, I. Z. & WALTON, K. (1981a). Presynaptic calcium currents in squid giant synapse. *Biophys. J.* **33**, 289–321.
- LLINAS, R., STEINBERG, I. Z. & WALTON, K. (1981b). Relationship between presynaptic calcium current and post-synaptic potential in squid giant synapse. *Biophys. J.* **33**, 323–351.
- NICHOLLS, J. G. & KUFFLER, S. W. (1964). Extracellular space as a pathway for exchange between blood and neurons in the central nervous system of the leech: The ionic composition of glial cells and neurons. *J. Neurophysiol.* **27**, 645–671.
- PARNAS, H., DUDEL, J. & PARNAS, I. (1986). Neurotransmitter release and its facilitation in crayfish. VII. Another voltage dependent process beside Ca entry controls the time course of phasic release. *Pflügers Arch. ges. Physiol.* **406**, 121–130.
- PARNAS, I. & PARNAS, H. (1986). Calcium is essential but insufficient for neurotransmitter release: the calcium-voltage hypothesis. *J. Physiol., Paris* **81**, 289–305.
- RAHAMIMOFF, R. & YAARI, Y. (1973). Delayed release of transmitter at the frog neuromuscular junction. *J. Physiol., Lond.* **228**, 241–257.
- ROSS, W. N., ARECHIGA, H. & NICHOLLS, J. G. (1987). Optical recording of calcium and voltage transients following impulses in cell bodies and processes of identified leech neurons in culture. *J. Neurosci.* **7**, 3877–3887.
- ROSS, W. N., ARECHIGA, H. & NICHOLLS, J. G. (1988). Influence of substrate on distribution of calcium channels in identified leech neurons in culture. *Proc. natn. Acad. Sci. U.S.A.* **85**, 4075–4078.
- SMITH, S. J., AUGUSTINE, G. J. & CHARLTON, M. P. (1985). Transmission at voltage-clamped giant synapse of the squid: Evidence for cooperativity of presynaptic calcium action. *Proc. natn. Acad. Sci. U.S.A.* **82**, 622–625.
- STANLEY, E. F. (1986). Decline in calcium cooperativity as the basis of facilitation at the squid giant synapse. *J. Neurosci.* **6**, 782–789.
- STEWART, R. R., NICHOLLS, J. G. & ADAMS, W. B. (1989). Na<sup>+</sup>, K<sup>+</sup> and Ca<sup>2+</sup> currents in identified leech neurones in culture. *J. exp. Biol.* **141**, 1–20.
- STEWART, R. R., NICHOLLS, J. G., ADAMS, W. B. & BOOKMAN, R. J. (1987). Correlation of Ca, Ba and Sr entry with 5-HT release at Retzius-P synapses in culture. *Soc. Neurosci. Abstr.* **13**, 1238.
